# Supplementary material
Source: publisher site journal article supplement (http://www.spandidos-publications.com/1598/downloadSupplementary)
Supplement: Supplementary file 1 [file downloadSupplementary]

Figure S1. Cnetplot analysis of commonly deregulated targeted genes and pathways in (A and B) newly diagnosed and (C and D) recurrent liver metastases. CTCs, circulating tumor cells.

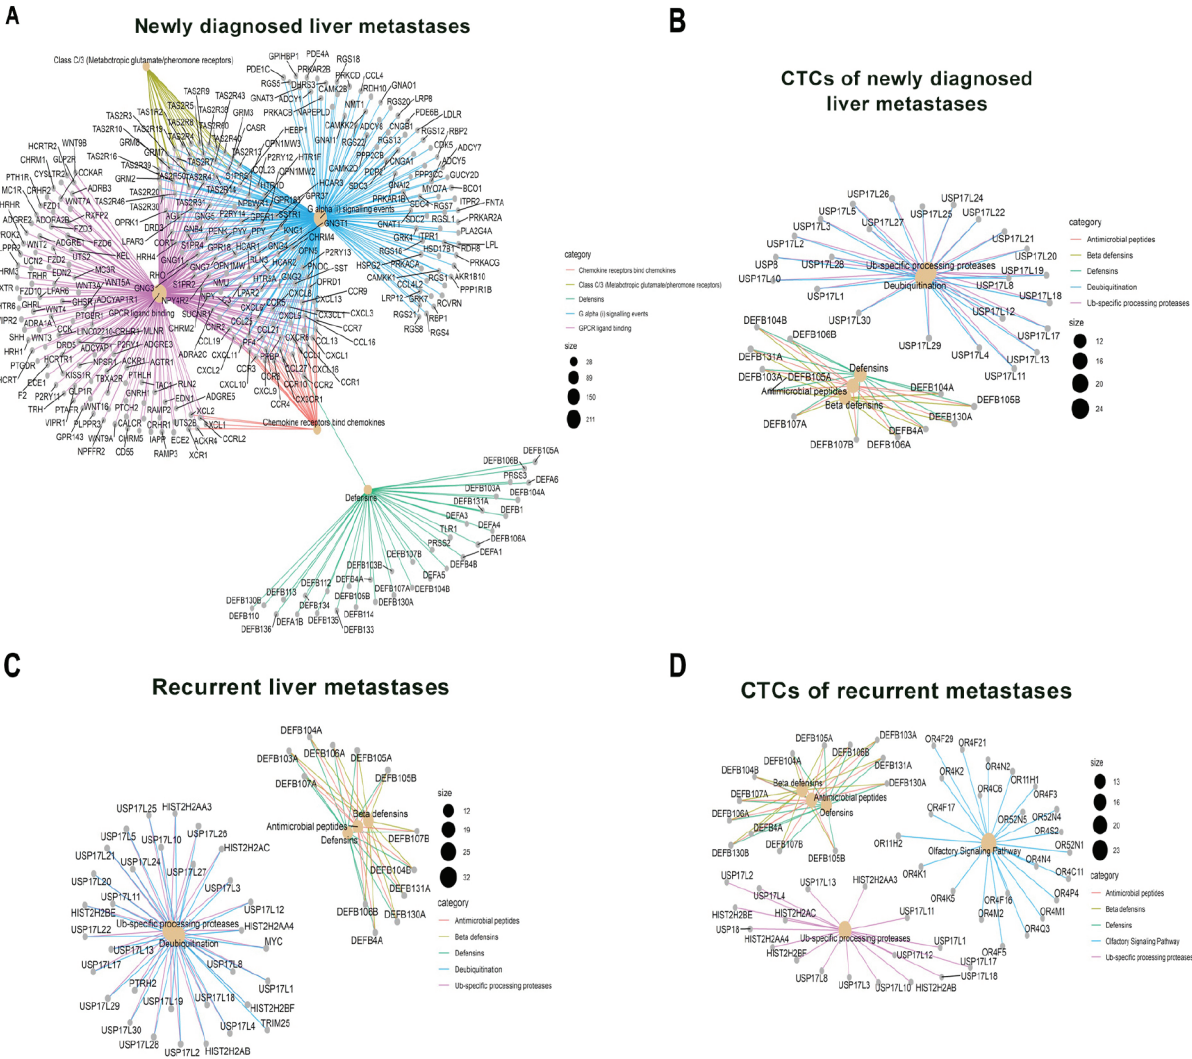

Table S1. CTC analysis data of clinical samples from breast cancer liver metastasis patients by three-color immunofluorescence.

| Case ID <sup>a</sup> | CK8 <sup>+</sup> /Nucleus <sup>+</sup> /CD45 <sup>-</sup><br>(CTC) | CK8 <sup>-</sup> /Nucleus <sup>+</sup> /CD45 <sup>+</sup><br>(WBC) | CK8 <sup>+</sup> /Nucleus <sup>+</sup> /CD45 <sup>-</sup><br>(EPC) |
|----------------------|--------------------------------------------------------------------|--------------------------------------------------------------------|--------------------------------------------------------------------|
| BCLM01L              | 6                                                                  | 2                                                                  | 0                                                                  |
| BCLM02H              | 151                                                                | 43                                                                 | 21                                                                 |
| BCLM03L              | 6                                                                  | 4                                                                  | 0                                                                  |
| BCLM04L              | 9                                                                  | 2                                                                  | 2                                                                  |
| BCLM05H              | 94                                                                 | 28                                                                 | 35                                                                 |
| BCLM06H              | 17                                                                 | 10                                                                 | 2                                                                  |
| BCLM07L              | 7                                                                  | 5                                                                  | 0                                                                  |
| BCLM08L              | 11                                                                 | 2                                                                  | 1                                                                  |
| BCLM09L              | 12                                                                 | 4                                                                  | 2                                                                  |
| BCLM10H              | 91                                                                 | 12                                                                 | 27                                                                 |
| BCLM11H              | 55                                                                 | 12                                                                 | 9                                                                  |
| BCLM12H              | 49                                                                 | 29                                                                 | 4                                                                  |
| BCLM13H              | 248                                                                | 120                                                                | 76                                                                 |
| BCLM14L              | 14                                                                 | 3                                                                  | 0                                                                  |
| BCLM15L              | 12                                                                 | 5                                                                  | 3                                                                  |
| BCLM16H              | 215                                                                | 31                                                                 | 34                                                                 |
| BCLM17L              | 12                                                                 | 3                                                                  | 7                                                                  |
| BCLM18L              | 9                                                                  | 0                                                                  | 0                                                                  |
| BCLM19L              | 14                                                                 | 2                                                                  | 0                                                                  |
| BCLM20L              | 6                                                                  | 6                                                                  | 0                                                                  |
| BCLM21H              | 102                                                                | 18                                                                 | 8                                                                  |
| BCLM22L              | 7                                                                  | 7                                                                  | 0                                                                  |
| BCLM23L              | 8                                                                  | 3                                                                  | 0                                                                  |
| BCLM24H              | 87                                                                 | 59                                                                 | 13                                                                 |
| BCLM25H              | 69                                                                 | 11                                                                 | 15                                                                 |
| BCLM26H              | 48                                                                 | 9                                                                  | 33                                                                 |
| Total                | 1,359                                                              | 430                                                                | 292                                                                |

<sup>a</sup>Low-CTCs are counted as  $\leq 15$  CTCs/7.5 ml and high-CTCs  $> 15$  CTCs/7.5 ml. CTC-positive patients were considered if at least 5 CTCs/7.5 ml were present. BCLML, breast cancer liver metastasis that were categorized as low-CTCs; BCLMH, breast cancer liver metastasis patients that were categorized as high-CTCs; CTC, circulating tumor cell; WBC, white blood cell; EPC, epithelial cell; CK, cytokeratin.
